# Supplementary material
Source: HighWire-hosted journal article supplement (https://diabetes.diabetesjournals.org/content/suppl/2006/03/28/55.4.865)

## Supplementary Figures Legends

**Supplementary Figure 1: Effects of AICAR and metformin on AMPK activity (A-D) glucose phosphorylation rate (C-F) and phosphorylation of ACC (B-E) in isolated hepatocytes from fed rat.** Hepatocytes from fed rats were incubated for 40 min with 10 mM glucose. The values are the means  $\pm$  SEM (n=4). \*,  $p < 0.05$  compared with control-vehicle. \$,  $p < 0.05$  compared with starved rats (Fig. 1).

**Supplementary Figure 2: Effects of L-NAME on AMPK activation (A) and glucose phosphorylation inhibition (B) by AICAR, metformin and oligomycin in isolated rat hepatocytes.** Rat hepatocytes were pre-incubated for 15 min in Krebs-Henseleit buffer containing 10 mM glucose with 1 mM L-NAME (open bars) or the vehicle (black bars). 1 mM AICAR, 5 mM metformin (Met), 1  $\mu$ M oligomycin (Oligo) or the vehicle were then added for 4h. The values are the means  $\pm$  SEM for four cell preparations. \*,  $p < 0.05$  compared with control-vehicle.

**Supplementary Figure 3: Effects of different inhibitors on AMPK activation (A) and glucose phosphorylation inhibition (B) by AICAR and metformin in cultured rat hepatocytes.** Primary culture of rat hepatocytes were pre-incubated for 45 min with 10  $\mu$ M SB202190 (open bars), 10  $\mu$ M SP600125 (striped bars), 50  $\mu$ M PD98059 (dotted bars), 1  $\mu$ M wortmannin (vertical bars) or vehicle (black bars) in basal HCM medium supplemented with 10 mM glucose. 1 mM AICAR, 5 mM metformin or vehicle were then added and hepatocytes were further incubated for 4 hours. The values are the means  $\pm$  SEM for three cell preparations. \*,  $p < 0.05$  compared with control-vehicle.

**Supplementary Figure 4: Basal activities of  $\alpha_1$  and  $\alpha_2$  isoforms of AMPK in cultured hepatocytes from wild-type and AMPK $\alpha_1\alpha_2$ LS<sup>-/-</sup> mice.** Primary cultured rat hepatocytes isolated from wild type (black bars) or AMPK $\alpha_1\alpha_2$ LS<sup>-/-</sup> mice (open bars) were cultured overnight as indicated in the Materials and Methods section.  $\alpha_1$  and  $\alpha_2$  specific AMPK activities were measured after immunoprecipitation of 75  $\mu$ g proteins with anti- $\alpha_1$  and anti- $\alpha_2$  antibodies. The values are the means  $\pm$  SEM for three cell preparations. \*,  $p < 0.05$  compared with  $\alpha_1$ . \$,  $p < 0.05$  compared with wild-type.

# Supplementary Figure 1

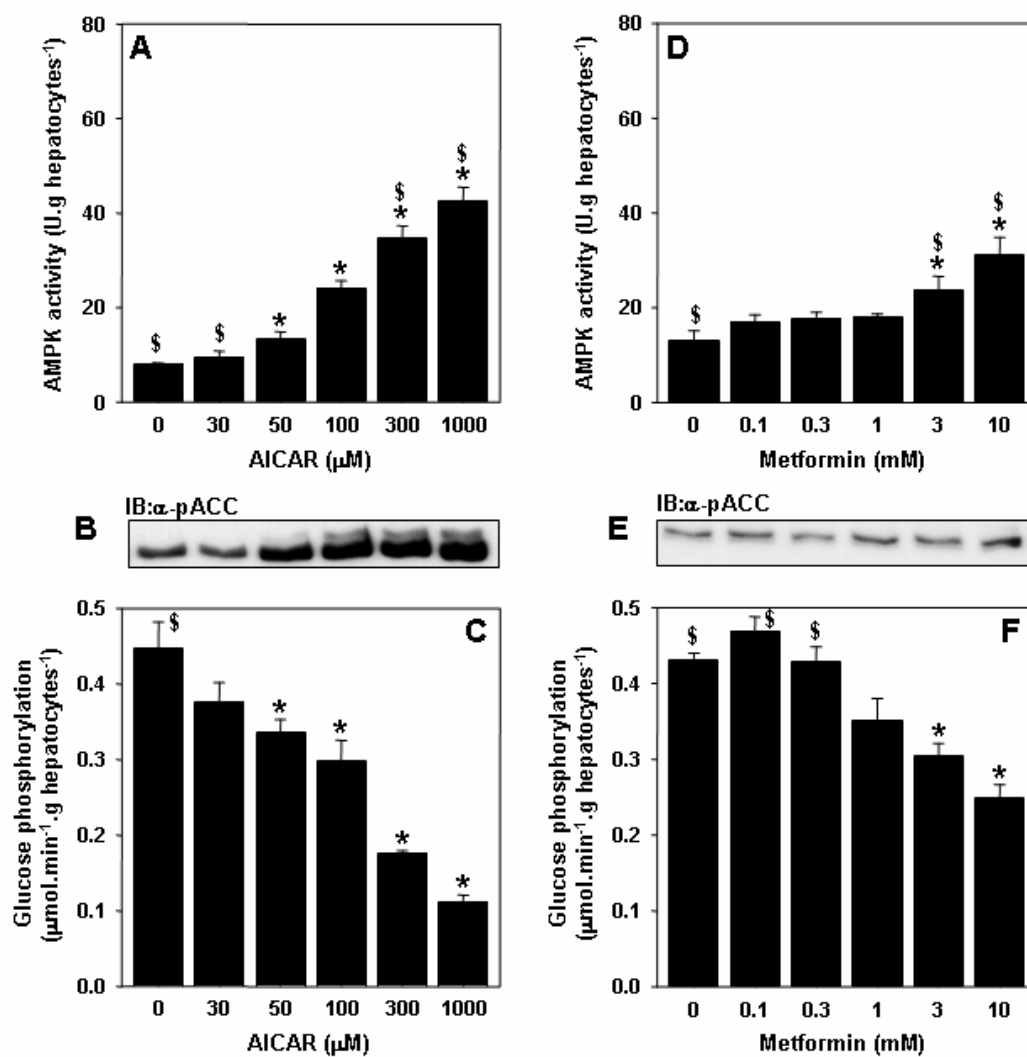

Supplementary Figure 2

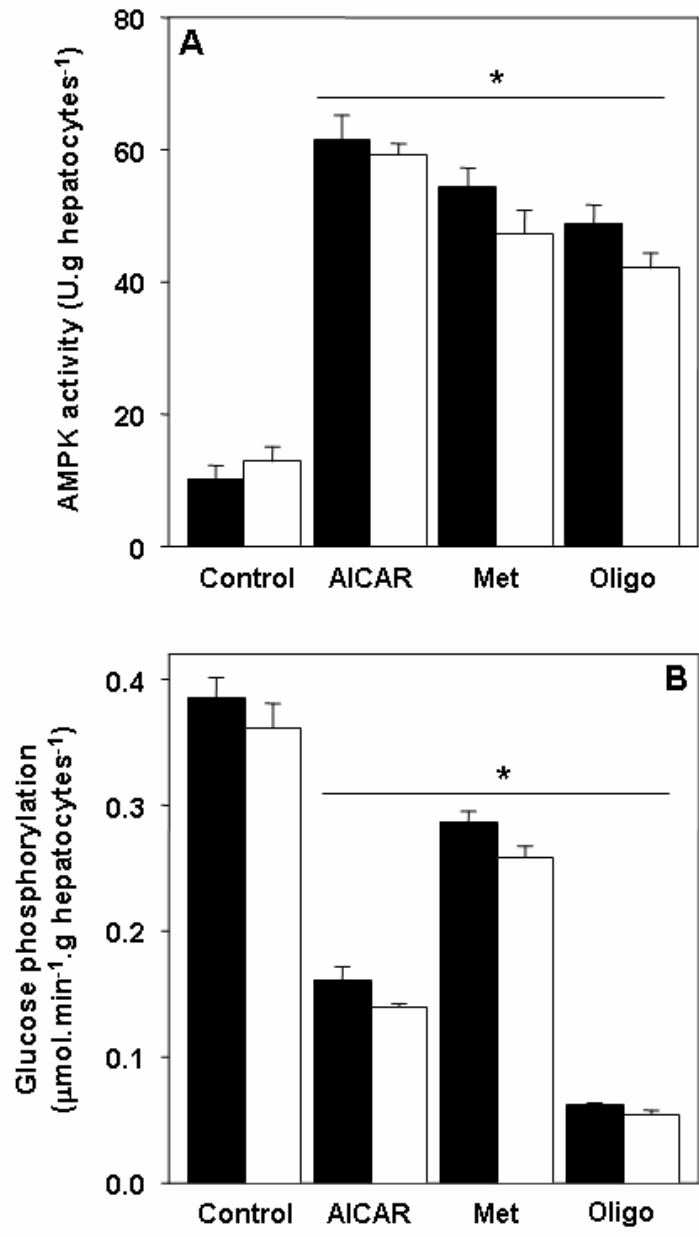

Supplementary Figure 3

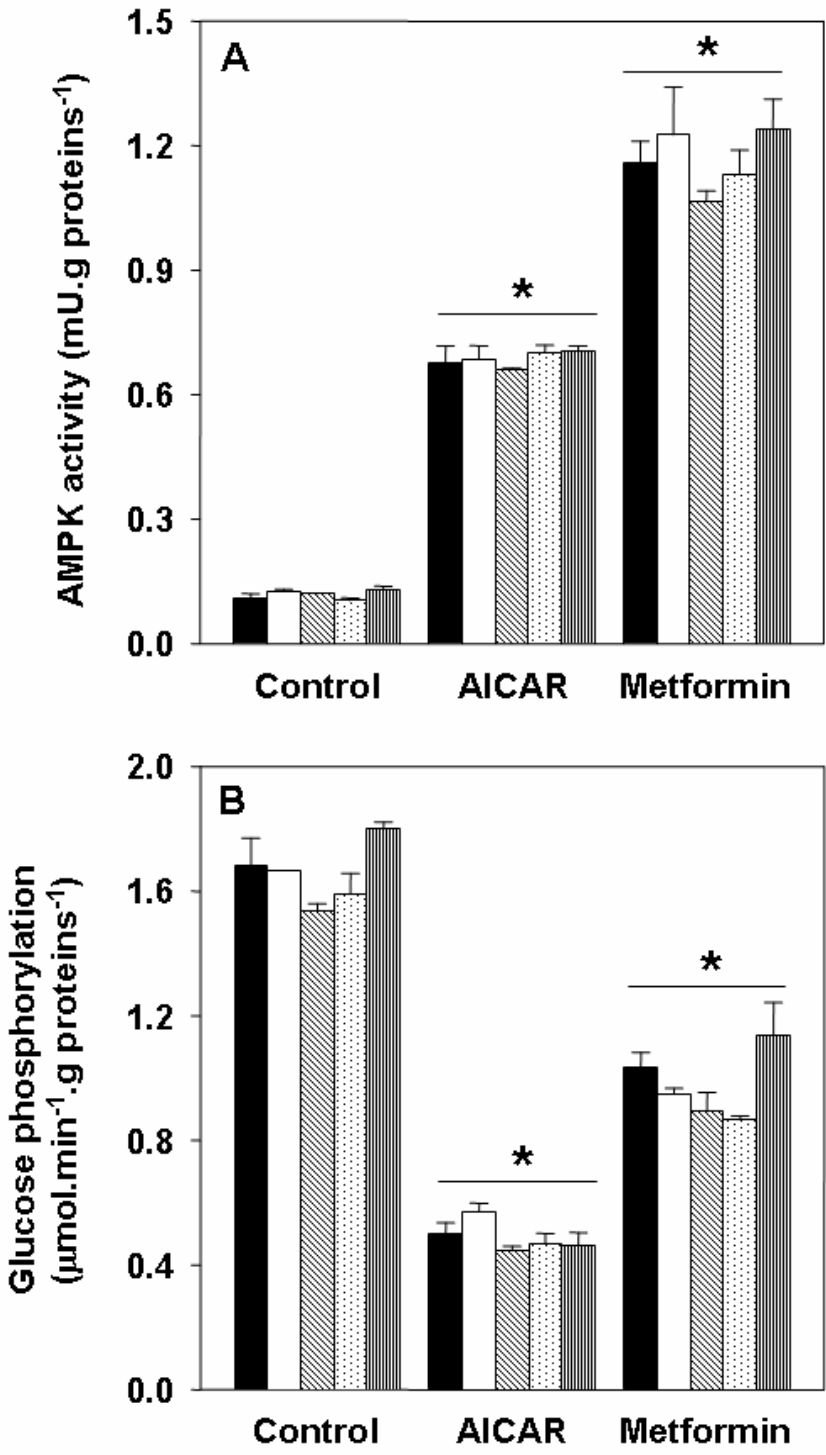

Supplementary Figure 4

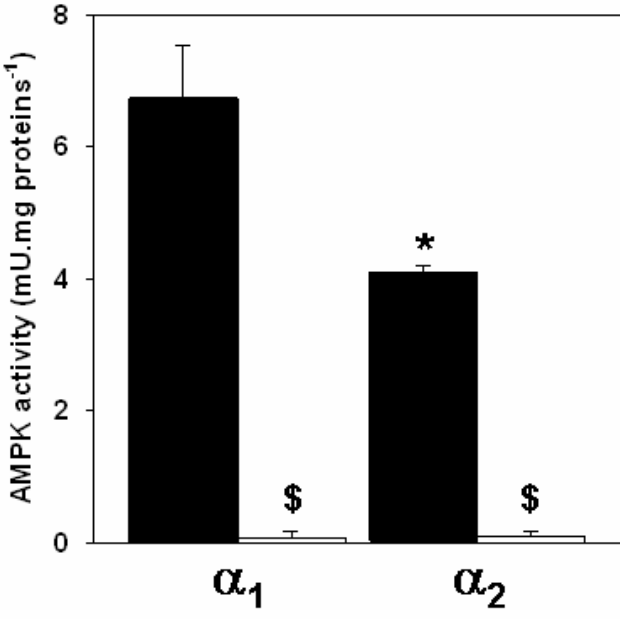

Supplement: db1178OnlineAppendix.pdf [file db1178OnlineAppendix.pdf]
